# Supplementary material for: Nanostructured lipid carriers containing benznidazole: physicochemical, biopharmaceutical and cellular in vitro studies
Source: PubMed Central journal article supplement (PMC10390827; doi:10.3762/bjnano.14.66), 2023-07-28
Supplement: Beilstein_J_Nanotechnol-14-804-s001.pdf [file Beilstein_J_Nanotechnol-14-804-s001.pdf]

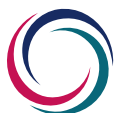

## Supporting Information

for

### **Nanostructured lipid carriers containing benzimidazole: physicochemical, biopharmaceutical and cellular in vitro studies**

Giuliana Muraca, María Esperanza Ruiz, Rocío C. Gambaro, Sebastián Scioli-Montoto, María Laura Sbaraglini, Gisel Padula, José Sebastián Cisneros, Cecilia Yamil Chain, Vera A. Álvarez, Cristián Huck-Iriart, Guillermo R. Castro, María Belén Piñero, Matias Ildebrando Marchetto, Catalina Alba Soto, Germán A. Islan and Alan Talevi

*Beilstein J. Nanotechnol.* **2023**, *14*, 804–818. [doi:10.3762/bjnano.14.66](https://doi.org/10.3762/bjnano.14.66)

## Supplementary material

**Table S1:** Goodness-of-fit measures of mathematical models of drug release for NLC-BNZ.

| Model            | $R^2$ | $R^2$ -adjusted | MSE | AIC |
|------------------|-------|-----------------|-----|-----|
| First order      | 0.97  | 0.97            | 14  | 22  |
| Hopfenberg       | 0.95  | 0.94            | 37  | 27  |
| Baker–Lonsdale   | 0.90  | 0.90            | 57  | 29  |
| Korsmeyer–Peppas | 0.99  | 0.99            | 5   | 18  |
| Hixon–Crowell    | 0.95  | 0.95            | 27  | 25  |

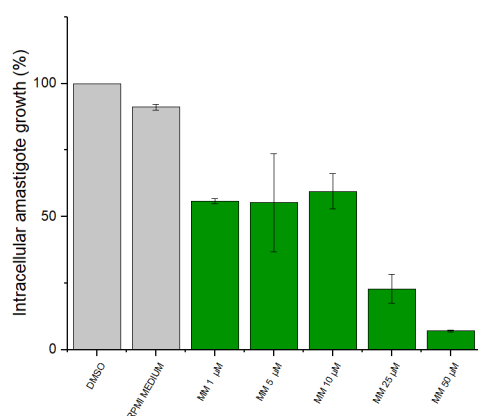

**Figure S1:** Dose-response effect of myristyl myristate on *T. cruzi* amastigotes.

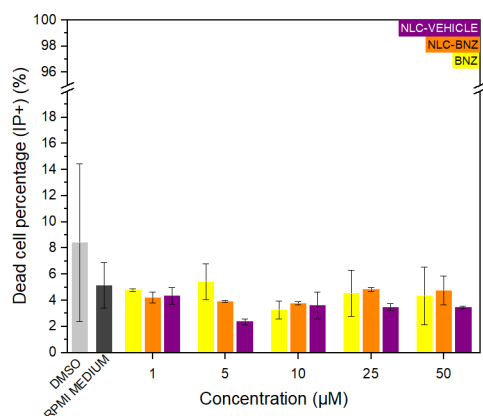

**Figure S2:** Flow cytometry measurements of cell cytotoxicity in Vero cells treated with free BNZ, NLC-VEHICLE, and NLC-BNZ.
